# Supplementary figures and images for: A photoelectrochemical cytosensor based on a Bi2S3–MoS2 heterojunction-modified reduced oxide graphene honeycomb film for sensitive detection of circulating tumor cells
Source: Royal Society of Chemistry journal article supplement (doi:10.1039/d3bm02010j), 2024-01-01

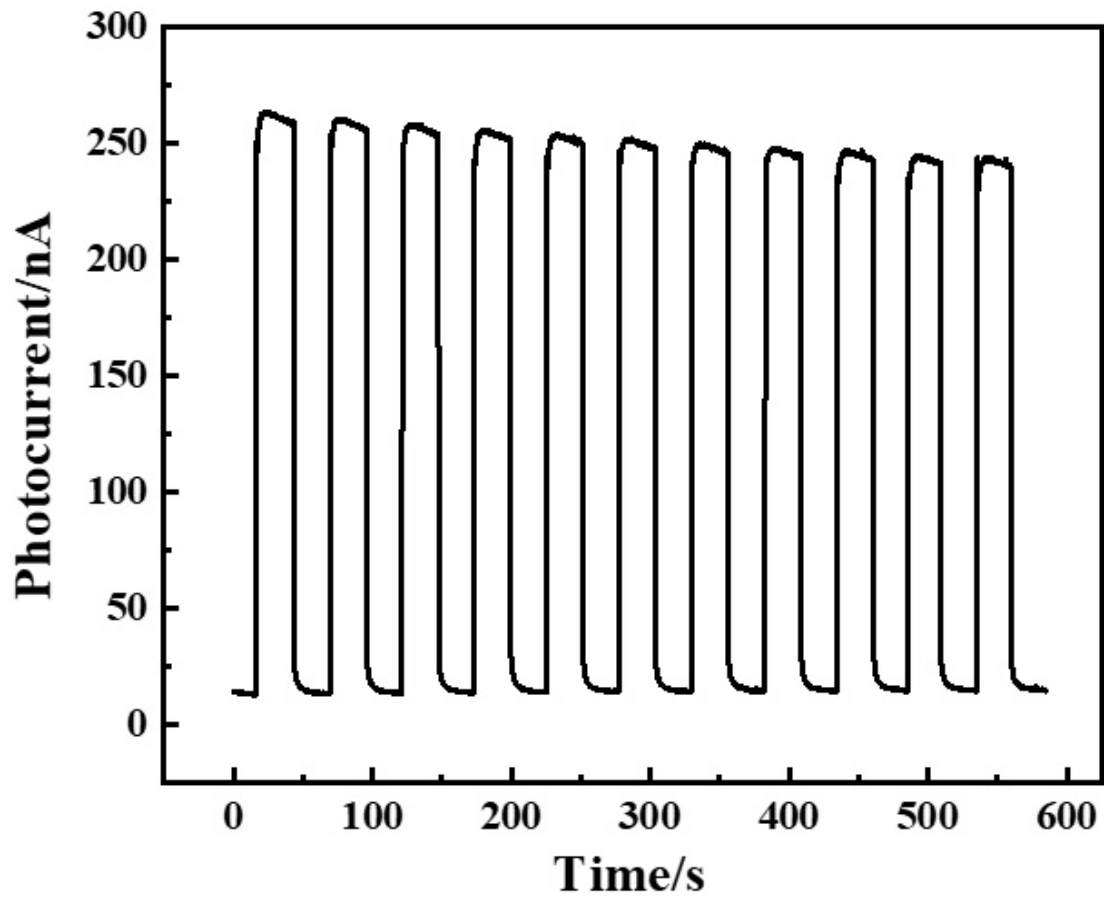

Supplement: d3bm02010j2.pdf [file d3bm02010j2.pdf]

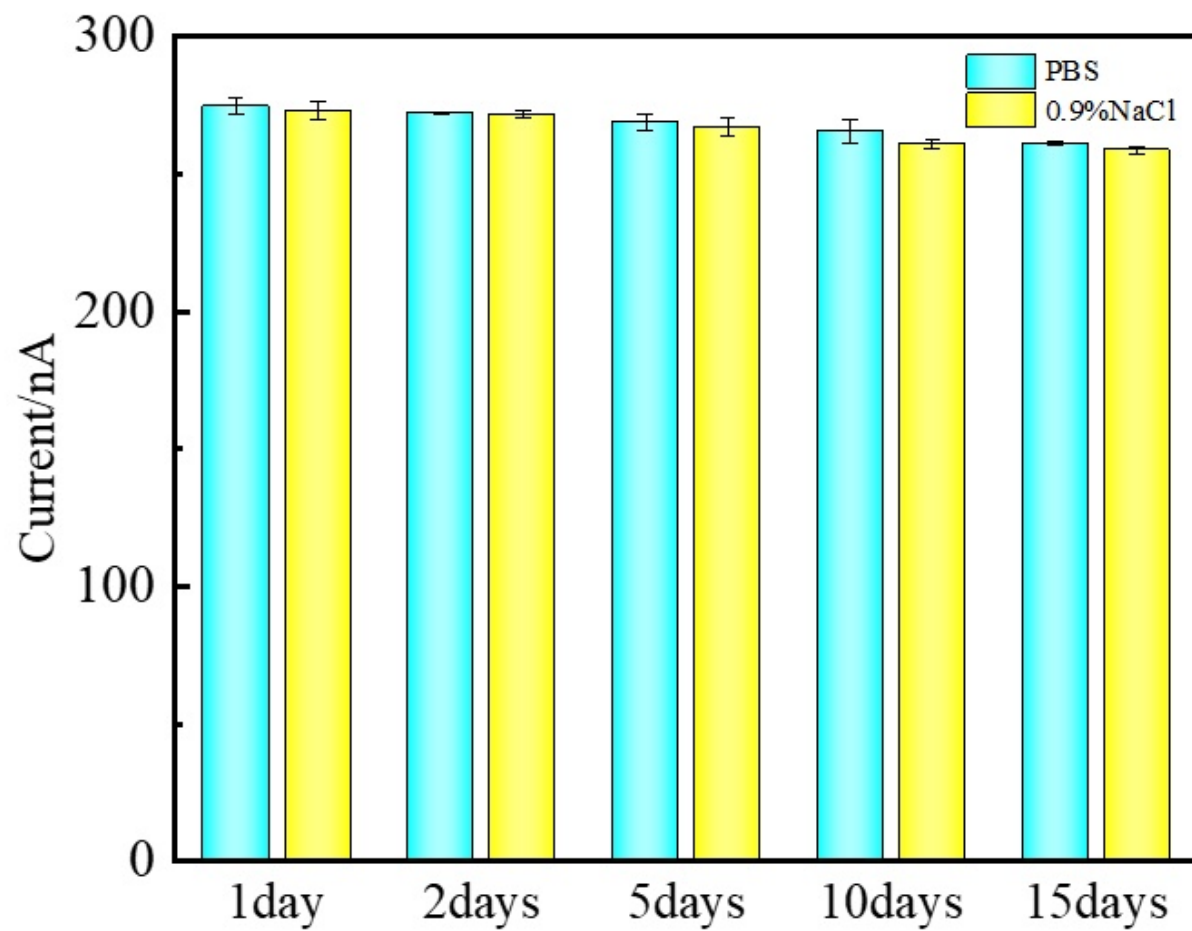

Supplement: d3bm02010j3.pdf [file d3bm02010j3.pdf]

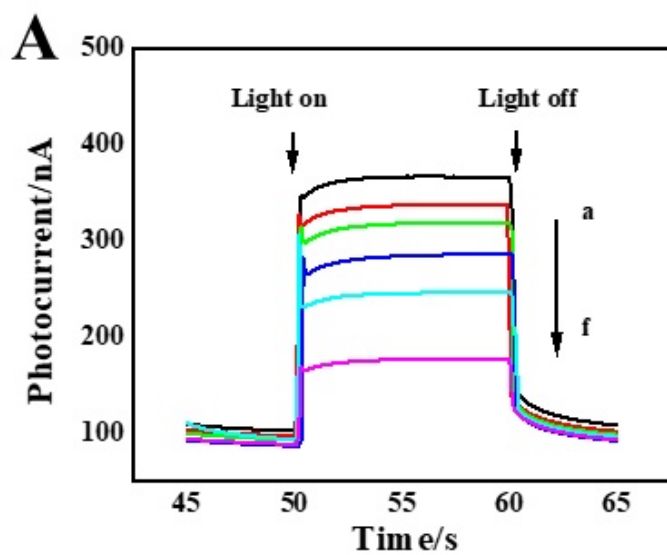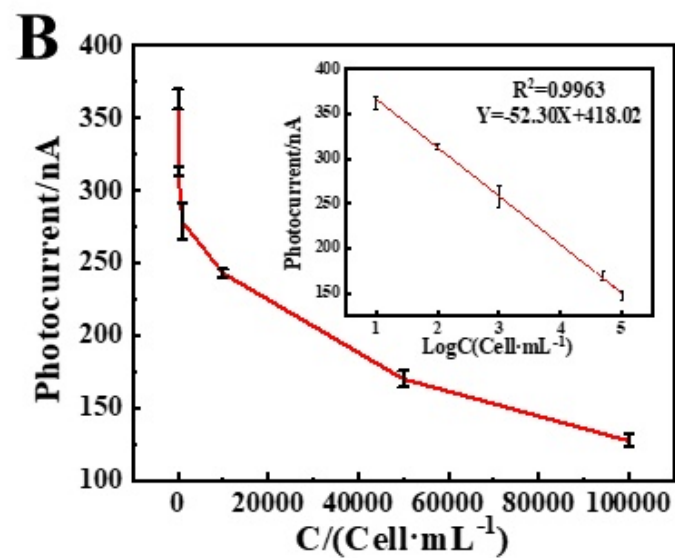

Supplement: d3bm02010j4.pdf [file d3bm02010j4.pdf]
